# Supplementary material
Source: Springer Nature journal article supplement (https://www.springermedizin.de/resource/supplementary/13014_2010_397_MOESM7_ESM.pdf/9633704)

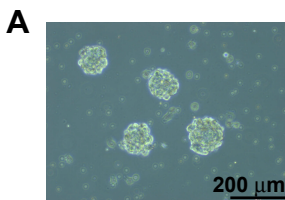

**B**

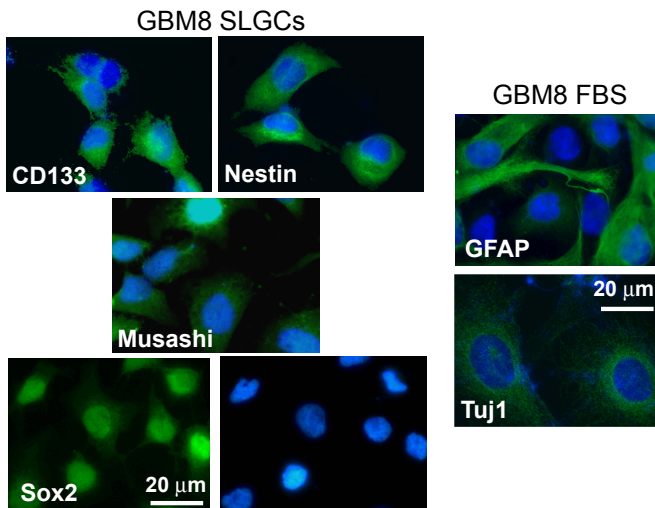

**C**

SLGCs differentiating in FBS

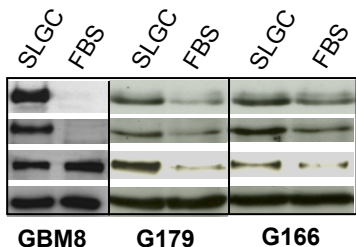

**D**

SLGCs not differentiating in FBS

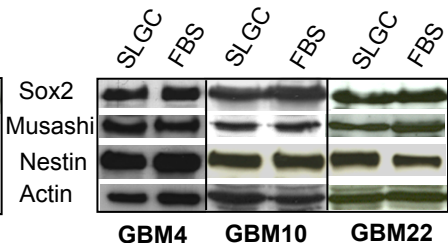

**E**

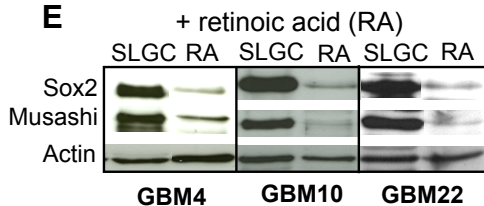

Supplement: MOESM7 [file 9633704]
